# Supplementary material for: Synthesis of Ammonium-Based Ionic Liquids for the Extraction Process of a Natural Pigment (Betanin)
Source: MDPI journal article supplement (doi:10.3390/molecules26185458), 2021-09-08
Supplement: s1 [file s1]

## Article

# Supplementary Material: Synthesis of Ammonium-Based Ionic Liquids for the Extraction Process of a Natural Pigment (Betanin)

Pedro Morales-García <sup>1</sup>, Evelyn Y. Calvillo-Muñoz <sup>1</sup>, Irina V. Lijanova <sup>1,\*</sup>, Natalya V. Likhanova <sup>2</sup>, Octavio Olivares-Xometl <sup>3</sup> and Paulina Arellanes-Lozada <sup>3</sup>

## Calculation of Extraction tests of betanin

This process was carried out mixing equimolar quantities of [TBMA]<sup>+</sup>[HEX]<sup>−</sup> and another IL obtained after the anionic exchange. In the end, eight extraction IL complexes were obtained and used in the first extraction tests. A 105-mg/L solution was prepared using commercial betanins (12% of pigment), deionized water and ascorbic acid adjusted at 0.10% (w/v) in the final solution (final pH 6). Quantities equivalent to 0.001 and 0.60 mmol of extraction complexes were weighed in 4-mL jars; later, 3 mL of pigment solution were added to each jar. The final system was stirred with a magnetic bar for 1 h at environment pressure and temperature. After the stirring process, the remaining betanins were quantified using Equation (1), which was done by making a calibration curve at different concentrations of betanins dissolved in water with 0.10% of ascorbic acid (pH 6).  $C_f$  is the final concentration of betanins in mg/L,  $D_F$  represents the dilution factor and  $Abs$  is the absorbance of the sample at 538 nm.

$$C_f = D_F \left( \frac{Abs - 0.0035}{0.1154} \right) \quad (1)$$

The  $C_f$  calculation helped estimate the extraction percentage ( $P_{ex}$ ), Equation (2).  $C_i$  is the pigment concentration at the beginning.

$$P_{ex} = 100 * \left( \frac{C_i - C_f}{C_i} \right) \quad (2)$$

The concentration of betanins in the organic phase ( $C_o$ ) was determined using Equation (3).  $V_w$  and  $V_o$  are the volumes of the aqueous and organic phases. The extraction complex with the highest  $P_{ex}$  was chosen to be used in other tests with natural red beet juice.

$$C_o = \frac{(C_i - C_f) * V_w}{V_o} \quad (3)$$

The red beet root was chopped in small 5-mm cubes and frozen at -5 °C. Fifty grams were weighed and mixed with a solution of ascorbic acid at 0.10% (w/v) in a porcelain mortar. The cubes were crushed until obtaining fine pulp, which was filtered using vacuum in order to collect the liquid extract in a flask. By the end of this process, 60 mL of the extract

were recovered and assessed by UV-vis at 538 nm using Equation (1) to calculate the betaine content in mg/L.

#### *Calculation of Desorption process*

Once the aqueous phase was removed, the remaining organic phase was treated with 400 µL of ethanol and 700 µL of sodium acetate solution at specific concentrations; 5, 10, 15 and 20 % (w/v) were tested to determine which of them could provide the best results. The sodium acetate solution was enriched with 0.10% of ascorbic acid. The system was stirred for 2 min and later it was left to rest for 20 min to stabilize the phases. The desorption percentage ( $P_{des}$ ) was calculated by the application of Equations (4) and (5):

$$C_{TD} = \frac{C_o * V_{oD}}{V_{wD}} \quad (4)$$

$$P_{des} = 100 * \left( \frac{C_{TD} - C_D}{C_{TD}} \right) \quad (5)$$

$C_{TD}$  is the theoretical concentration of betanin in the new aqueous phase after desorption,  $V_{oD}$  and  $V_{wD}$  are the volumes of the new organic and aqueous phases and  $C_D$  is the concentration of the separated pigment from the new aqueous phase, which was determined by means of Equation (1) as well. Finally, the sodium acetate solution that presented the highest  $P_{des}$  was used in the desorption process of betalains recovered from natural red beet juice.

#### *Partition coefficient ( $K_{LI's/W}$ ) estimation*

This parameter was determined through the models by Betageri, G. V., *et al.*, 1987 [28] (Equations 6 and 7) and Lima, Á. S., *et al.*, 2017 [22] (Equation 8),

$$K_{LI's/W}^m = \frac{W_w(C_i - C_f)}{C_f * W_o} \quad (6)$$

$$K_{LI's/W} = K_{LI's/W}^m * \left( \frac{\rho_o}{\rho_w} \right) \quad (7)$$

$$K_{LI's/W} = \frac{C_o}{C_f} \quad (8)$$

where  $K_{LI's/W}^m$  and  $K_{LI's/W}$  are the partition coefficients in molality and molarity, respectively;  $W_w$  and  $W_o$  represent the mass of the aqueous and organic phases, and  $C_o$  and  $C_f$  refer to the concentration of betanins in the organic and aqueous phases after the extraction process.
